# Supplementary material for: Engineering of methionine-auxotroph Escherichia coli via parallel evolution of two enzymes from Corynebacterium glutamicum's direct-sulfurylation pathway enables its recovery in minimal medium
Source: PubMed Central journal article supplement — Metab Eng Commun. 2024 May 10;18:e00236. doi: 10.1016/j.mec.2024.e00236 (PMC11109467; doi:10.1016/j.mec.2024.e00236), 2024-05-10
Supplement: mmc1.pdf [file mmc1.pdf]

# Supplementary information

**Engineering of methionine-auxotroph *Escherichia coli* via parallel evolution of two enzymes from *Corynebacterium glutamicum*'s direct-sulfurylation pathway enables its recovery in minimal medium**

Matan Gabay<sup>1,#</sup>, Inbar Stern<sup>1,#</sup>, Nadya Gruzdev<sup>2</sup>, Adi Cohen<sup>1</sup>, Lucia Adriana-Lifshits<sup>1</sup>, Tamar Ansbacher<sup>1,4</sup>, Itamar Yadid<sup>2,3,\*</sup> and Maayan Gal<sup>1,\*</sup>

<sup>1</sup>Department of Oral Biology, Goldschleger School of Dental Medicine, Faculty of Medicine, Tel Aviv University, Tel Aviv, 6997801, Israel

<sup>2</sup>Migal - Galilee Research Institute, Kiryat Shmona, 11016, Israel.

<sup>3</sup>Tel-Hai College, Upper Galilee, 1220800, Israel.

<sup>4</sup>Hadassah Academic College, 91010 Jerusalem, Israel

**# Equal contribution**

**\* Corresponding authors**

Itamar Yadid; Email: [itamarya@migal.org.il](mailto:itamarya@migal.org.il)

Maayan Gal; Email: [mayyanga@tauex.tau.ac.il](mailto:mayyanga@tauex.tau.ac.il)

*Chroococcidiopsis*/1-340 1 ..... MPEQSQTEIFDLGDFQLSTGFISNAKLAYKTHKLNAA...KDNAILFPFLGSAPE... 55  
*Corynebacterium glutamicum*/1-377 1 ..... MPTLAPSGQLEIQAIGDVSTEAIIITNAEIAVHRWGEYRVDKGRSNVLLIEHALTQDSN... 61  
*Mycobacterium hassiacum*/1-374 1 ..... MTMADAEIARLPAEGELGIVDIGALTLSEAVIDNQIAYVERWGEELSPS...RDVVVVVHALTQDSHVAGP 69  
*Mycobacterium smegmatis*/1-380 1 ..... MTIIIEERATDTGMATVPLPAEGEIGLVHIGALTLLENITVFDVTIAVQRWGEELAPD...RGVVMMVHALTQDSHVTPG 78  
*Anabaena variabilis*/1-359 1 ..... MNYQDFISEQTEYYHLVPVFELEGGVITGVQVAYRTWGEKLNLSA...GDGVGLICHALTQDSAD... 60  
*Anabaena*/1-359 1 ..... MNYQDFISEQTEYYHLVPVFELEGGVITGVQVAYRTWGEKLNLSA...GDGVGLICHALTQDSAD... 60  
*Salinibacter ruber*/1-352 1 ..... MSQ-TLTVPTLLENSTTRDVPVAYRTWGEELNAT...GTNAVLVCHALTQDSAD... 50  
*Thermus thermophilus*/1-380 1 MSEIALEAWGEHEALLKPPRSPISIPPPKPRTAVALFPRREGFYTELGGYIPEVRLRFETYGTLSRR...RDNAVLVFHALTQDSAHLAGT 87  
*Leptospira interrogans*/1-366 1 ..... MNETSIGIIE-E...TKYAEFKELILNNSVLSVPIVIAVETYSGLSSS...KNNAILICHALSQDAHAAGY 64  
*Chloroflexus aurantiacus*/1-378 1 ..... MEAIVQAPTPEGVIV-R...TQRMHWTPLTLTSSATGAPITLAVIETYSGLAPD...RSNAILILHALSQDAHAAGF 71  
*Geobacter lovleyi*/1-367 1 ..... MSIGVV-H...EQTITFEAGIRLESRIIAPITLVVLYETSMNAD...CSNIVIMVEHAWTQDAHLAG 81  
*Deferribacter desulfuricans*/1-377 1 ..... MKENSVLV-K...TKYVTFKDDFYFESRIISPIITVAVIETYSKLNK...KDNAILICHALTSAHAAGY 64

*Chroococcidiopsis*/1-340 56 ..... ALEIYIGEDRPLPRKYFIIILPGLLNGVSSSPSNTAPF...DRGAF...PQTHIA...DIVIAQHRLVTEKF 121  
*Corynebacterium glutamicum*/1-377 62 ..... AADWADLLCPGKAINDIRYCVICTNVIGGNGSTGPGSMHFD...GNFWGNRFPATSIROQVNAEKQF-LDALG 132  
*Mycobacterium hassiacum*/1-374 70 AGPNY...PTPGWDDGVVPGAAIDTRRWCAIATNVLGGGSGSTGPGSLHFD...GKAWGSRFPVAVTRQVRRADLAA-LNAMG 146  
*Mycobacterium smegmatis*/1-380 77 AGDGH...PTAGWDDVAGPGAPIIDTWHCAIATNVLGGGSGSTGPGSLAFD...GKPGWGRFPQITIRQVVAADRAA-LAALG 153  
*Anabaena variabilis*/1-359 61 ..... ADEWDEGLLANKALSDRDFIICSNILGSGYGTGATSINRQTGIPYGAISPAITIRDMVRLQAAL-IOHLG 132  
*Anabaena*/1-359 61 ..... ADEWDEGLLANKALSDRDFIICSNILGSGYGTGATSINRQTGIPYGAISPAITIRDMVRLQAAL-IOHLG 132  
*Salinibacter ruber*/1-352 51 ..... VADWDEGLLPGRALSDRDFVVLVVPVGGSPYGSVAVPTVNDTQERYAGFPFITTRRLRLHRAA-LETLG 122  
*Thermus thermophilus*/1-380 88 YDEETFRSLSPLEQAFREGWDSLVGPRILDPALVYVVSANHLGSGYSGTGPLSLDPLHTGRPYGRDFPPLTIRRLARAQARL-DHLG 176  
*Leptospira interrogans*/1-366 65 HSGSD...KKPGWDDYIIGPKSFTNQYFICSNVIGGKSGSGPLSIHPETSTPYGRSFPVSIQDMVKAQKLL-VESLG 142  
*Chloroflexus aurantiacus*/1-378 72 HSPDT...RKPGWDDAMICGPRPFITNRYFVICSNVIGGKSGSGPLSIHPETSTPYGRSFPVSIQDMVKAQKLL-VESLG 149  
*Geobacter lovleyi*/1-367 62 RREDD...PKPGWDDAIVGPRLLTDYRYCVLCSNVIGGKSGSGPLSIHPETSTPYGRSFPVSIQDMVKAQKLL-LDLHG 139  
*Deferribacter desulfuricans*/1-377 85 NSPDD...QKPGWDDMIIGPKAFITDXYFICSNVIGGKSGYGTGATGASIDESTGPKYGLKFPVFTVMKMLQKLL-IDYLG 142

*Chroococcidiopsis*/1-340 122 DELYLWLVGALQTYEAWVRF...HMVKRAASIGAPKPSPTWLLWLRTAIEEP...LADPANNFYTD-PQAVQABL...RQAH 203  
*Corynebacterium glutamicum*/1-377 133 ITTVAALVGGSMGARTLEWAAMYF...ETVGAAVLAVSARASAWQIGIQSAQ-IKAIENDHHHEHNYYESGCFATGLGAARRIAH 217  
*Mycobacterium hassiacum*/1-374 147 HQVAAVGGSMGARAELWVIGH...ETVRAGLILAVGARATADQIGTQSTQ-VAATKADPNHQNDDYGTGLKPDVGLQIARRFAH 231  
*Mycobacterium smegmatis*/1-380 154 ITEVAAVGGSMGARAELWVTHF...DDVRAGLVAVGARATADQIGTQSTQ-VAATKADPNHQNDDYGTGLKPDVGLQIARRFAH 238  
*Anabaena variabilis*/1-359 133 IKSLLVIGGSLGGMQVLEWALLYE...EIVQAIAPITSGRHSAWCIGLSEAAQ-ROAIYADPNWKGNYTK-EQPPSQGLAVARMMAM 216  
*Anabaena*/1-359 133 IKSLLVIGGSLGGMQVLEWALLYE...EIVQAIAPITSGRHSAWCIGLSEAAQ-ROAIYADPNWKGNYTK-EQPPSQGLAVARMMAM 216  
*Salinibacter ruber*/1-352 123 QVRVACAVGGSMGMHVLEWAEATDDGAFVRSVLPVAVGGHATAWQIGWAAQ-ROAIFADPKKRDITYP-DDPPTNGLATARMMAM 210  
*Thermus thermophilus*/1-380 177 VEKAI...VIGGSLGGMVALEFALMYP...ERVKKLVVLAAPARHGPAWAFNHL-S-ROALLODPEYQKSN...PAPKSMALARGIAM 254  
*Leptospira interrogans*/1-366 143 EKLLCVAAGSMGMQALEWVIAYP...NSLSNCLVMASTAESHAMQIAFNEVG-ROAILSDPNKKNLKY-D-ENSFRKGLALARVMVG 225  
*Chloroflexus aurantiacus*/1-378 150 IDTLVAAGSMGMQALEWVIEYF...QRVRAIILLATSPSSPQTVAWNYIG-RRAIMADPRMRGDYD-SDAFRDGLAVARMLGH 233  
*Geobacter lovleyi*/1-367 140 IRRLLCVMGGSMGMQALEWATQYF...ERRASVVALATTPRSPQASLNLAVA-RWAIYNDPTFKKKEYK...HNPKDGALARGIGH 221  
*Deferribacter desulfuricans*/1-377 143 EKLLCVAAGSMGMQALEWAVTF...EKTYSIIPITAGRIITPMIAFNTIG-RFAIMKDPNMMNDYVG-KTFPRDGLAARMAHG 226

*Chroococcidiopsis*/1-340 204 VMALTLPLPGFYREGEEVWRTIGFASMD...DFVSRFWEAFMLPQDPNNLVNQRKTRAA...PSA-GGDLSAALS 274  
*Corynebacterium glutamicum*/1-377 218 L...TYRGELEIDERFGTKAQKNENPLGYPYKPDQRFVAVESLDYQADKLVQRFDAAGSVLLTDALNRHDIRDRGGLNKAL 298  
*Mycobacterium hassiacum*/1-374 232 L...TYRGEVELDTRFGNAPQDDENPLL...GGRYAVESVLEYQGRKLVDFDAGTYVLTDSLSSHVGRGRRGVEAALS 307  
*Mycobacterium smegmatis*/1-380 239 L...TYRGEELDDRANTPQDDDPLT...GGRYAVESVLEYQGGKLVDFDAGTYVLTDSLSSHVGRGRRGVEAALS 314  
*Anabaena variabilis*/1-359 217 S...ARSWQSF TARGRQYDVA...ADQFAIASVQLHHGQKLVQRFDAANTYITLTQAMDSDVAQGR-DYKSVLQS 286  
*Anabaena*/1-359 217 S...ARSWQSF TARGRQYDVA...ADQFAIASVQLHHGQKLVQRFDAANTYITLTQAMDSDVAQGR-DYKSVLQS 286  
*Salinibacter ruber*/1-352 211 V...SYRSRPSLDGRGRDAMPEQD...GTPYAVESVLLHHGNKLVDFDANCVALTRQMDSDVARGRGGYAKVLR 283  
*Thermus thermophilus*/1-380 255 M...SYRAPEGF EARWGAEP...GETYLDYQGEKFLRRFHESVLLSRAMDTHVGRGRRGVEEALKR 319  
*Leptospira interrogans*/1-366 226 I...TSLSDMKREKFRNPPR-GNI...LSTDFAVGSYLIYQGESVDFDANSYIYVTKLHDHSLGKGG-ELTAALS 298  
*Chloroflexus aurantiacus*/1-378 224 I...TFLCEEKLEQRRVRRV-DGALD...LGRFAIEHLEHQAAFRNDRFDANSYLVI TRAMPNDL TARYGSLTAAFDL 308  
*Geobacter lovleyi*/1-367 232 I...TFLSDSMMWQKERRRSKDGDFD...FFGQFEVERLRYNGYNFVDFDANCEFLYRAKALDLYVAVWGYESMTDAF 298  
*Deferribacter desulfuricans*/1-377 227 I...TMSDKSFHKKGRRYATFGIYD...FFGYFEVENLRYNGYKFTEDANS...LYI IKAMDIFLDSYGYGSEEAIGR 303

*Chroococcidiopsis*/1-340 275 IKA-QMVFVAF TGRMFP...PEEQQRDAERIPNA...KYWEVNSIGGHLTTFSLTEQDRQAMDVLRQVLT... 340  
*Corynebacterium glutamicum*/1-377 299 IKV-PVLVAGVDTDIILYFYHQEHLRNLGNL...LAMAKIVSPVGHDAF...TESRQMDRIVRNFFSLISPEDNPSTYIEFYI 377  
*Mycobacterium hassiacum*/1-374 308 CEV-PVVVGGFTSDRLYFLRLQEEELALMPGC...RGLNVVESIYGHDFLIETEAAGKLI RQTELEASRP... 374  
*Mycobacterium smegmatis*/1-380 315 CPV-PVVVGGFTSDRLYFLRLQEEELALMPGC...RGLNVVESIYGHDFLIETEAAGKLI RQTELEASRP... 380  
*Anabaena variabilis*/1-359 287 IKQ-PALVVAIDSDILYFPTEQEQELADFI PDA...QLGWLQSYGHDAFLIDIATLSQLVINFRQSLSLKFTSDVTT... 359  
*Anabaena*/1-359 287 IKQ-PALVVAIDSDILYFPTEQEQELADFI PDA...QLGWLQSYGHDAFLIDIATLSQLVINFRQSLSLKFTSDVTT... 359  
*Salinibacter ruber*/1-352 284 IEQ-PSLVVGDSDVLYRLSEQEQELAEHLPSA...TLEVLSPHGDFTLIELDANLVLSTWRANICSSVAA... 352  
*Thermus thermophilus*/1-380 320 LRAIPSLFVGDITDILLYFAWEVRQAAKAA...GARYREIKSPHGHDAFLIETDQVEEILDALF... 380  
*Leptospira interrogans*/1-366 299 ATC-RFLVVYSYSDWLYFPAQSREIVKSLAADKRVFYVELQGECHDSFLLKPKQIEILKGFLENPN... 366  
*Chloroflexus aurantiacus*/1-378 309 TRA-RFLALAYSYSDWLYFPAETTYQMAAAQAAGRSFTTHLITDADHAF...LTDVAAQSELIRDFLNRMLTE... 378  
*Geobacter lovleyi*/1-367 299 ITA-PIQFFAFSSDWLYFPPYQTEEMVTCQLGGLKEVEYHLIQSAYGHDAFLLEHETFTPMVRSLLERVAP... 367  
*Deferribacter desulfuricans*/1-377 304 IEA-DSLIFITFTSDFLFSYQTEEIVNIMKNHGNPEWVNI...DYGHDAFLLEFDTQTSCKIEFLSKYINNVANQ... 377

**Figure S1.** Sequence alignment of MetX of the following bacterial strains: *Geobacter lovleyi* (B3E278), *Leptospira interrogans* (Q8F4I0), *Thermus thermophilus* (Q9RA51), *Anabaena variabilis* (Q3M5Q6), *Deferribacter desulfuricans* (D3P9D1), *Chloroflexus aurantiacus* (A9WKM8), *Salinibacter ruber* (Q2S5A6), *Mycobacterium hassiacum* (K5B926), *Mycobacterium smegmatis* (A0QSZ0), *Anabaena variabilis* (Q3M5Q6) and *Chroococcidiopsis thermalis* (F9GTW70).

**Table S1. Protein sequences.**

| Protein name                                                         | Sequence                                                                                                                                                                                                                                                                                                                                                                                                                                                                               |
|----------------------------------------------------------------------|----------------------------------------------------------------------------------------------------------------------------------------------------------------------------------------------------------------------------------------------------------------------------------------------------------------------------------------------------------------------------------------------------------------------------------------------------------------------------------------|
| MetX CG                                                              | MPTLAPSGQLEIQAIGDVSTEAGAIKNAEIAHYHRWGEYRVDKEGRSNVVLIEHALTGDSN<br>AADWWADLLGPGKAINTDIYCVICTNVIGGCNGSTGPGSMHPDGNFWGNRFPATSIRDQ<br>VNAEKQFLDALGITTVA AVLGGSMGGARTLEWAAMYPEIVGAAAVLAVSARASAWQIGIQ<br>SAQIKAIENDHHWHEGNYYESGCNPATGLGAARRIAHLTYRGELEIDERFGTKAQKNEN<br>PLGPYRKPDQRFAVESYLDYQADKLVQRF DAGSYVLLTDALNRHDIGRDRGGLNKALES I<br>KVPVLVAGVDTDILYLYHQQEHL SRNLGNLLAMAKIVSPVGHDAFLTESRQMDRIVRNFF<br>SLISPDENNPSTYIEFYI                                                                  |
| MetX CG R46H,<br>L315P                                               | MPTLAPSGQLEIQAIGDVSTEAGAIKNAEIAHYHRWGEYRVDKEGHSNVVLIEHALTGDSN<br>AADWWADLLGPGKAINTDIYCVICTNVIGGCNGSTGPGSMHPDGNFWGNRFPATSIRDQ<br>VNAEKQFLDALGITTVA AVLGGSMGGARTLEWAAMYPEIVGAAAVLAVSARASAWQIGIQ<br>SAQIKAIENDHHWHEGNYYESGCNPATGLGAARRIAHLTYRGELEIDERFGTKAQKNEN<br>PLGPYRKPDQRFAVESYLDYQADKLVQRF DAGSYVLLTDALNRHDIGRDRGGLNKALES I<br>KVPVLVAGVDTDILYPYHQQEHL SRNLGNLLAMAKIVSPVGHDAFLTESRQMDRIVRNFF<br>SLISPDENNPSTYIEFYI                                                                  |
| MetY CG                                                              | MGPKYDNSNADQWGFETR SIHAGQSVDAQTSARNLPIYQSTAFVFDSAEHAKQRFALE<br>DLGPVYSRLTNPTVEALENRIASLEGGVHAVAFSSGQAATTNAILNLAGAGDHIVTSPRLY<br>GGTETLFLITLNLRLGIDVSFVENPDDPESWQAAVQPNTKAFFGETFANPQADVLDIPAVAE<br>VAHRNSVPLIIDNTIATAALVRPLELGADV VVASLTKFYTGNGSGLGGVLIDGGKFDWTV E<br>KDGKSVFPYFVTPDAAYHGLKYADLGAPAFGLKVRVGLLRDTGSTLSAFNAWAAVQGID<br>TLSRLRERHNENAIKVAEFLNNHEKVEKVNFAGLKDSPWYATKEKLGLKYTG SVLTFEIKG<br>GKDEAWAFIDALKLHSNLANIGDVRSLVHPATTTSHSQSDEAGLARAGVTQSTVRLSVGI<br>ETIDDIADLEGGFAAI |
| MetY-del                                                             | MGPKYDNSNADQWGFETR SIHAGQSVDAQTSARNLPIYQSTAFVFDSAEHAKQRFALE<br>DLGPVYSRLTNPTVEALENRIASLEGGVHAVAFSSGQAATTNAILNLA                                                                                                                                                                                                                                                                                                                                                                        |
| CAB0498630                                                           | MPTKYDNSNANKWGFETR SIHAGQSVSDTGARNLPIYLTSSYVFND AEHAANRFNLSD<br>AGPVYSRLTNPTVA AVEERLANLEGGVHAVLFASGMAAETAAILNIARAGSHIVSSPRIYG<br>GTETLFAVTLHAWASKPLS                                                                                                                                                                                                                                                                                                                                  |
| Link to<br>sequencing<br>results of Naive<br>and enriched<br>library | <a href="https://drive.google.com/drive/folders/1t8xtPBNrBfUSPrZRAVRsKONzSCJ5YzMx?usp=sharing">https://drive.google.com/drive/folders/1t8xtPBNrBfUSPrZRAVRsKONzSCJ5YzMx?usp=sharing</a>                                                                                                                                                                                                                                                                                                |

**Table S2. Vitamin mix**

| <b>Vitamin mix</b>                          | <b>500 mL</b> |
|---------------------------------------------|---------------|
| p-aminobenzoic acid                         | 0.5 gr        |
| Niacin                                      | 0.5 gr        |
| Pyridoxine                                  | 0.5 gr        |
| Riboflavin                                  | 0.5 gr        |
| Thiamin HCl                                 | 0.5 gr        |
| Choline HCl                                 | 0.5 gr        |
| d-Biotin                                    | 1 mg          |
| Store at 4 °C in the dark after autoclaving |               |

**Table S3. Trace element solution**

| Trace elements solution                                                                                         | 250 mL<br>(H <sub>2</sub> O) |
|-----------------------------------------------------------------------------------------------------------------|------------------------------|
| H <sub>3</sub> BO <sub>3</sub>                                                                                  | 100 mg                       |
| CuSO <sub>4</sub> 5H <sub>2</sub> O                                                                             | 100 mg                       |
| Iron chloride 4H <sub>2</sub> O                                                                                 | 200 mg                       |
| MnCl <sub>2</sub>                                                                                               | 200 mg                       |
| NaMoO <sub>4</sub> 2H <sub>2</sub> O                                                                            | 200 mg                       |
| ZnSO <sub>4</sub> 7H <sub>2</sub> O                                                                             | 2 gr                         |
| Add HCl until the brown murky solution turns clear and yellow, filter sterile through 0.2 μM, keep in the dark. |                              |

**Table S4. Primers used in this study**

| <b>Primer name</b> | <b>Sequence</b>            | <b>Use</b>                     |
|--------------------|----------------------------|--------------------------------|
| cTrc_Ins_Fw        | ATAAGGAGGAATAAACCATGGGTCCG | Error-prone PCR and sequencing |
| cTrc_Ins_Rev       | GGTACCAGCTGCAGATCTCGAGTTA  | Error-prone PCR and sequencing |
| metY_F_SEQ         | AAAGTTCGTGTGGGCCTGCT       | Sequencing                     |
| metY_R_SEQ         | AGCAGGCCACACGAACTTT        | Sequencing                     |
| metX_F_SEQ         | TGGTTCTGATCGAACACGCGC      | Sequencing                     |

**Table S5. Sequence of MetYX CG construct**

| Gene                                                                             | Sequence                                                                                                                                                                                                                                                                                                                                                                                                                                                                                                                                                                                                                                                                                                                                                                                                                                                                                                                                                                                                                                                                                                                                                                                                                                                                                                                                                                                                                                                                                                                                                                                                                                                                                                                                                                                                                                                                                                                                                                                                                                                                                                                                                                                                                                                                                                                                  |
|----------------------------------------------------------------------------------|-------------------------------------------------------------------------------------------------------------------------------------------------------------------------------------------------------------------------------------------------------------------------------------------------------------------------------------------------------------------------------------------------------------------------------------------------------------------------------------------------------------------------------------------------------------------------------------------------------------------------------------------------------------------------------------------------------------------------------------------------------------------------------------------------------------------------------------------------------------------------------------------------------------------------------------------------------------------------------------------------------------------------------------------------------------------------------------------------------------------------------------------------------------------------------------------------------------------------------------------------------------------------------------------------------------------------------------------------------------------------------------------------------------------------------------------------------------------------------------------------------------------------------------------------------------------------------------------------------------------------------------------------------------------------------------------------------------------------------------------------------------------------------------------------------------------------------------------------------------------------------------------------------------------------------------------------------------------------------------------------------------------------------------------------------------------------------------------------------------------------------------------------------------------------------------------------------------------------------------------------------------------------------------------------------------------------------------------|
| <p>Wild-type MetXY gene of CG that was cloned and transformed to the E. coli</p> | <pre> &gt; metYX_CG_OQ291222 gaattcTTTATTCTTGACACTAGTCGGCCAAAATGATATAATACCTGAGTTT AACTTTAAGAGAGGTATATATTACCATGGGTCCGAAGTACGACAACAGC AACGCGGATCAGTGGGGCTTCGAGACCCGTAGCATCCACGCGGGTCA GAGCGTTGACGCGCAAACAGCGCGCGTAACCTGCCGATTTACCAGA GCACCGCGTTTCGTGTTTGACAGCGCGGAGCACGCGAAACAACGTTTC GCGCTGGAAGATCTGGGCCCGGTTTATAGCCGTCTGACCAACCCGAC CGTGGAGGCGCTGGAAAACCGTATTGCGAGCCTGGAGGGTGGCGTT CATGCGGTGGCGTTTAGCAGCGGTCAGGCGGCGACCACCAACGCGAT CCTGAACCTGGCGGGTGGCGGTGACCACATTGTTACCAGCCCGCGTC TGTATGGTGGCACCGAAACCCTGTTCTGATCACCTGAACCGTCTGG GCATTGATGTTAGCTTTGTGGAGAACCCGGATGATCCGGAAAGCTGGC AGGCGGCGGTTCAACCGAACACCAAGGCGTTCTTTGGCGAGACCTTT GCGAACCCGCAAGCGGACGTGCTGGATATCCCGGCGGTTGCGGAAG TGCGCACCGTAACAGCGTTCGCTGATCATTGACAACACCATTGCGA CCGCGGCGCTGGTGCCTCCGCTGGAGCTGGGTGCGGATGTGGTTGT GGCGAGCCTGACCAAGTTCTACACCGGTAACGGCAGCGGTCTGGGTG GCGTTCTGATCGACGGTGGCAAATTTGATTGGACCGTGGAAAAGGAC GGCAAAGCGTTTTCCCGTATTTTGTACCCCGGATGCGGCGTACCAC GGTCTGAAGTATGCGGATCTGGGTGCGCCGGCGTTTGGTCTGAAAGT TCGTGTGGGCCTGCTGCGTGACACCGGTAGCACCTGAGCGCGTTTA ACGCGTGGGCGGCGGTTCAAGGCATCGATACCCTGAGCCTGCGTCTG GAGCGTCACAACGAAAACGCGATTAAGGTGGCGGAGTTCCTGAACAA CCACGAGAAGGTTGAAAAAGTGAACTTTGCGGGTCTGAAGGATAGCC CGTGGTACGCGACCAAGGAAAAACTGGGCCTGAAATATACCGGTAGC GTGCTGACCTTCGAGATCAAGGGTGGCAAAGACGAAGCGTGGGCGTT TATTGATGCGCTGAAACTGCACAGCAACCTGGCGAACATCGGCGACGT TCGTAGCCTGGTTGTGCATCCGGCGACCACCACCCATAGCCAAAGCG ATGAGGCGGGCCTGGCGCGTGCGGGTGTGACCCAAAGCACCGTTTCG TCTGAGCGTGGGTATCGAGACCATTGACGATATCATTGCGGACCTGGA AGGTGGCTTCGCGGCGATTTAAGGATCCAGAGGTATATATTAatgCCGAC CCTGGCGCCGAGCGGTCAGCTGGAGATCCAAGCGATTGGTGACGTTA GCACCGAGGCGGGCGCGATCATTACCAACGCGGAAATTGCGTACCAC CGTTGGGGTGAGTATCGTGTGGACAAAGAAGGCCGTAGCAACGTGGT TCTGATCGAACACGCGCTGACCGGTGATAGCAACGCGGCGGACTGGT GGGCGGATCTGCTGGGTCCGGGCAAGGCGATCAACACCGACATTTAC TGCGTTATCTGCACCAACGTGATCGGTGGCTGCAACGGCAGCACCGG TCCGGGCAGCATGCACCCGGATGGTAACTTCTGGGGCAACCGTTTTTC CGGCGACCAGCATTCTGACCAGGTTAACGCGGAGAAACAATTCCTG GATGCGCTGGGTATTACCACCGTTGCGGCGGTGCTGGGTGGCAGCAT GGGTGGCGCGCGTACCCTGGAGTGGGCGGCGATGTATCCGGAAACC GTTGGTGCGGCGGCGGTGCTGGCGGTTAGCGCGCGTGCAGCGCGT GGCAGATCGGCATTCAGAGCGCGCAAATCAAGGCGATTGAAAACGATC ACCACTGGCACGAGGGTAACTACTATGAAAGCGGCTGCAACCCGGCG ACCGGTCTGGGTGCGGCGCGTCTGATTGCGCACCTGACCTACCGTGG TGAGCTGGAAATCGACGAGCGTTTTTGGCACCAAGGCGCAGAAAAACG AAAACCCGCTGGGTCCGTATCGTAAGCCGGATCAACGTTTCGCGGTTG </pre> |

|  |                                                                                                                                                                                                                                                                                                                                                                                                                                                                  |
|--|------------------------------------------------------------------------------------------------------------------------------------------------------------------------------------------------------------------------------------------------------------------------------------------------------------------------------------------------------------------------------------------------------------------------------------------------------------------|
|  | AGAGCTACCTGGACTATCAGGCGGATAAACTGGTTCAACGTTTTGACG<br>CGGGTAGCTACGTGCTGCTGACCGATGCGCTGAACCGTCACGACATT<br>GGCCGTGATCGTGGTGGCCTGAACAAGGCGCTGGAGAGCATTAAAGT<br>GCCGTTCTGGTGGCGGGCGTTGACACCGATATCCTGTACCCGTATCA<br>CCAGCAAGAACACCTGAGCCGTAACCTGGGTAACCTGCTGGCGATGG<br>CGAAAATCGTTAGCCCGGTGGGTCATGATGCGTTCCTGACCGAAAGCC<br>GTCAAATGGATCGTATTGTGCGTAACTTCTTTAGCCTGATCAGCCCGGA<br>CGAGGATAACCCGAGCACCTACATTGAATTTTATATCTAACTCGAGCAA<br>CCTGGAGGCGGGCGCAGGCCCGCCTTTTaagctt |
|--|------------------------------------------------------------------------------------------------------------------------------------------------------------------------------------------------------------------------------------------------------------------------------------------------------------------------------------------------------------------------------------------------------------------------------------------------------------------|
